# Supplementary material for: Epoxide functionalization on cholane side chains in the identification of G-protein coupled bile acid receptor (GPBAR1) selective agonists
Source: Royal Society of Chemistry journal article supplement (doi:10.1039/c7ra04922f), 2017-01-01

**Epoxide functionalization on cholane side chains in the  
identification of G-protein coupled bile acid receptor (GPBAR1)  
selective agonists**

Simona De Marino, Adriana Carino, Dario Masullo, Claudia Finamore, Valentina Sepe,  
Silvia Marchianò, Francesco Saverio Di Leva, Vittorio Limongelli, Stefano Fiorucci, and  
Angela Zampella

**Supplementary Information**

|                   |           |
|-------------------|-----------|
| 1. Table 1        | page. 2   |
| 2. Tables 2 and 3 | page. 3   |
| 3. Figures S1-S3  | pages 4-6 |
| 4. NMR Spectra    | page. 7   |

**Table 1.**  $^1\text{H}$  and  $^{13}\text{C}$  NMR data ( $\text{CDCl}_3$ ) of steroidal nucleus for compounds **1**<sup>a</sup> (700 and 175 MHz) and **4**<sup>b</sup>(400 and 100 MHz)

| Position | <b>1</b>               |                     | <b>4</b>            |                     |
|----------|------------------------|---------------------|---------------------|---------------------|
|          | $\delta_{\text{H}}$    | $\delta_{\text{C}}$ | $\delta_{\text{H}}$ | $\delta_{\text{C}}$ |
| 1        | 1.04, 1.78             | 35.4                | 0.97, 1.80          | 35.3                |
| 2        | 1.33, 1.67             | 30.2                | 1.33, 1.66          | 30.5                |
| 3        | 3.60 m                 | 71.6                | 3.62 m              | 71.9                |
| 4        | 1.40, 1.87             | 29.1                | 1.50, 1.76          | 36.4                |
| 5        | 1.61                   | 48.3                | 1.38                | 42.0                |
| 6        | 4.04 dt (12.0, 4.6 Hz) | 68.0                | 1.26, 1.85          | 27.2                |
| 7        | 1.10, 1.64             | 34.9                | 1.09, 1.42          | 26.4                |
| 8        | 1.42                   | 34.9                | 1.41                | 35.8                |
| 9        | 1.35                   | 39.7                | 1.40                | 40.2                |
| 10       | -                      | 35.7                | -                   | 34.6                |
| 11       | 1.17, 1.38             | 20.7                | 1.25, 1.41          | 20.8                |
| 12       | 1.14, 1.96             | 39.8                | 1.17, 1.97          | 40.4                |
| 13       | -                      | 42.6                | -                   | 42.7                |
| 14       | 1.12                   | 56.0                | 1.05                | 56.5                |
| 15       | 1.06, 1.57             | 24.2                | 1.04, 1.56          | 24.2                |
| 16       | 1.28, 1.87             | 28.1                | 1.26, 1.85          | 28.3                |
| 17       | 1.12                   | 56.0                | 1.13                | 56.1                |
| 18       | 0.65 s                 | 12.1                | 0.65 s              | 12.0                |
| 19       | 0.91 s                 | 23.4                | 0.92 s              | 23.4                |

<sup>a</sup> The data reported for compound **1** are identical with those of compound **2**, **5** and **6**. <sup>b</sup> The data reported for compound **4** are identical with that of compound **3**.

**Table 2.**NMR data (CDCl<sub>3</sub>) of side chains for compounds **1**, **2**, **5** and **6**<sup>a</sup>

| Position | <b>1</b>            |                     | <b>2</b>            |                     | <b>5</b>            |                     | <b>6</b>                       |                     |
|----------|---------------------|---------------------|---------------------|---------------------|---------------------|---------------------|--------------------------------|---------------------|
|          | $\delta_{\text{H}}$ | $\delta_{\text{C}}$ | $\delta_{\text{H}}$ | $\delta_{\text{C}}$ | $\delta_{\text{H}}$ | $\delta_{\text{C}}$ | $\delta_{\text{H}}^{\text{b}}$ | $\delta_{\text{C}}$ |
| 20       | 1.42                | 35.2                | 1.43                | 35.5                | 1.62                | 34.2                | 1.65                           | 34.1                |
| 21       | 0.93 d (7.0 Hz)     | 18.6                | 0.93 d (6.7 Hz)     | 18.7                | 0.99 d (6.5 Hz)     | 18.9                | 1.04 (1.05) d                  | 19.0                |
| 22       | 1.21, 1.47          | 32.3                | 1.18, 1.58          | 32.0                | 1.17, 1.72          | 34.8                | 1.63                           | 38.8                |
| 23       | 1.40, 1.60          | 25.6                | 1.41, 1.58          | 29.3                | 2.74 t (6.1)        | 63.4                | 2.93 m                         | 53.6                |
| 24       | 2.66 t (6.0 Hz)     | 64.7                | 2.88 m              | 52.9 (52.7)         | -                   | 58.7                | 2.80 m (2.72)<br>2.47 m (2.40) | 48.1                |
| 25       | -                   | 58.3                | 2.47 m, 2.75 m      | 47.3 (47.1)         | 1.32 s              | 24.8                |                                |                     |
| 26       | 1.30 s              | 24.9                |                     |                     | 1.25 s              | 19.2                |                                |                     |
| 27       | 1.25 s              | 18.6                |                     |                     |                     |                     |                                |                     |

<sup>a</sup> NMR data at 700 MHz (**1** and **2**), 500 MHz (**5**) and 400 MHz (**6**) respectively.

<sup>b</sup> Selected <sup>1</sup>H NMR (CD<sub>3</sub>OD):  $\delta_{\text{H}}$  4.00 (dt, J= 12.0, 4.5 Hz, H-6), 3.50 (m, H-3), 2.95 (m, H-23), 2.78 (2.70) (t, J = 4.5 Hz, H-24), 2.46 (2.38) (dd, J= 5.1, 2.7 Hz, H-24), 1.08 (1.07) (d, J=6.8 Hz, H<sub>3</sub>-21), 0.93 (s, H<sub>3</sub>-19), 0.71 (s, H<sub>3</sub>-18)

**Table 3.**NMR data (CDCl<sub>3</sub>) of side chains for compounds **3** and **4** (400 MHz, CDCl<sub>3</sub>)

| Position | <b>3</b>            |                     | <b>4</b>            |                     |
|----------|---------------------|---------------------|---------------------|---------------------|
|          | $\delta_{\text{H}}$ | $\delta_{\text{C}}$ | $\delta_{\text{H}}$ | $\delta_{\text{C}}$ |
| 20       | 1.42                | 35.2                | 1.43                | 35.5                |
| 21       | 0.92 d (7.0 Hz)     | 18.5                | 0.93 d (6.7 Hz)     | 18.5                |
| 22       | 1.20, 1.47          | 32.2                | 1.19, 1.58          | 32.0                |
| 23       | 1.40, 1.60          | 25.6                | 1.41, 1.58          | 29.2                |
| 24       | 2.67 t (6.0 Hz)     | 64.7                | 2.87 m              | 52.9 (52.7)         |
| 25       | -                   | 58.3                | 2.46 m, 2.75 m      | 47.3 (47.1)         |
| 26       | 1.30 s              | 24.9                |                     |                     |
| 27       | 1.26 s              | 18.6                |                     |                     |

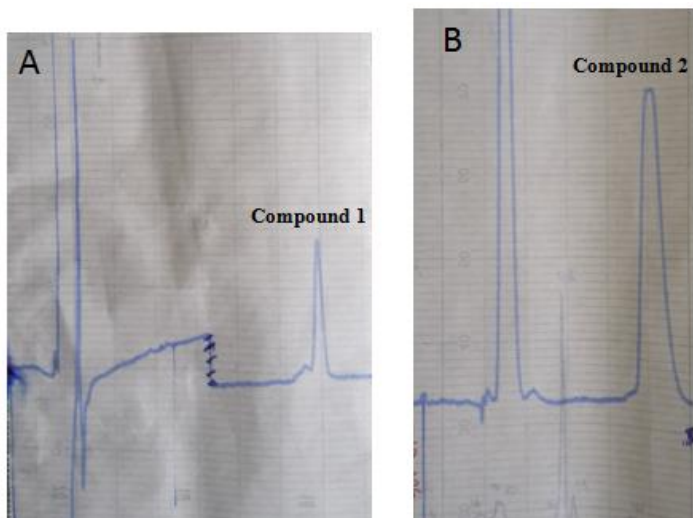

**Fig. S1.** Purification of compound **1** (Panel A,  $t_R = 15$  min) and compound **2** (Panel B,  $t_R = 11.2$  min) by HPLC, equipped with a differential refractometer, on Phenomenex Luna C18 (5  $\mu\text{m}$ ; 4.6 mm i.d. x 250 mm) with MeOH/H<sub>2</sub>O (85:15) as eluent (flow rate 1 mL/min).

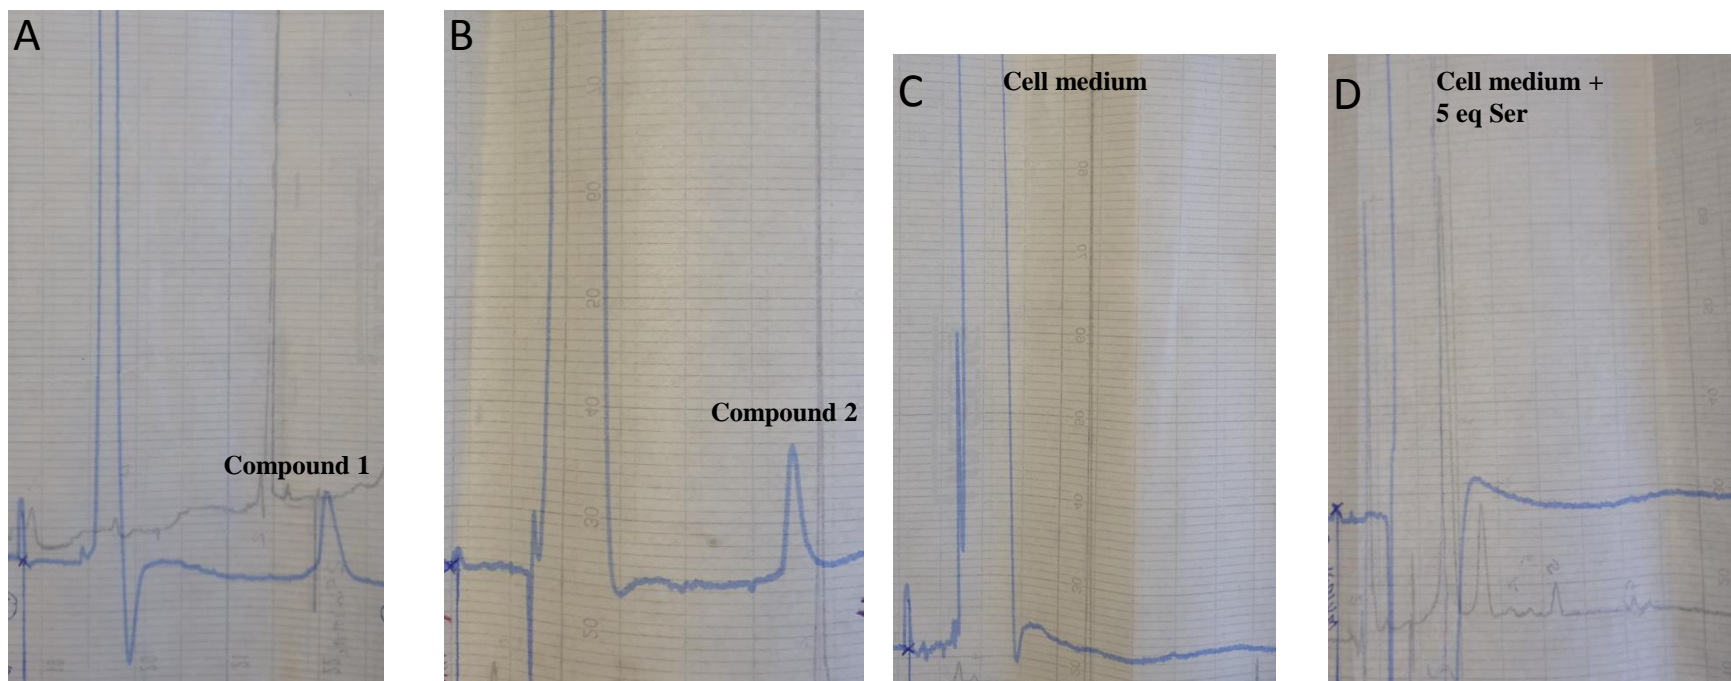

**Fig. S2. A-B)** HPLC traces of standard solution prepared diluting 1  $\mu\text{L}$  of a 60  $\mu\text{M}$  solution in DMSO of the compound **1** and **2**, respectively, with 499  $\mu\text{L}$  of MeOH/H<sub>2</sub>O (85:15); **C)** HPLC trace of cell medium alone (D-MEM additioned with 10% FBS); **D)** HPLC trace of cell medium additioned with 5 eq. Ser. HPLC was performed on Phenomenex Luna C18 (5  $\mu\text{m}$ ; 4.6 mm i.d. x 250 mm) with MeOH/H<sub>2</sub>O (85:15) as eluent (flow rate 1 mL/min).

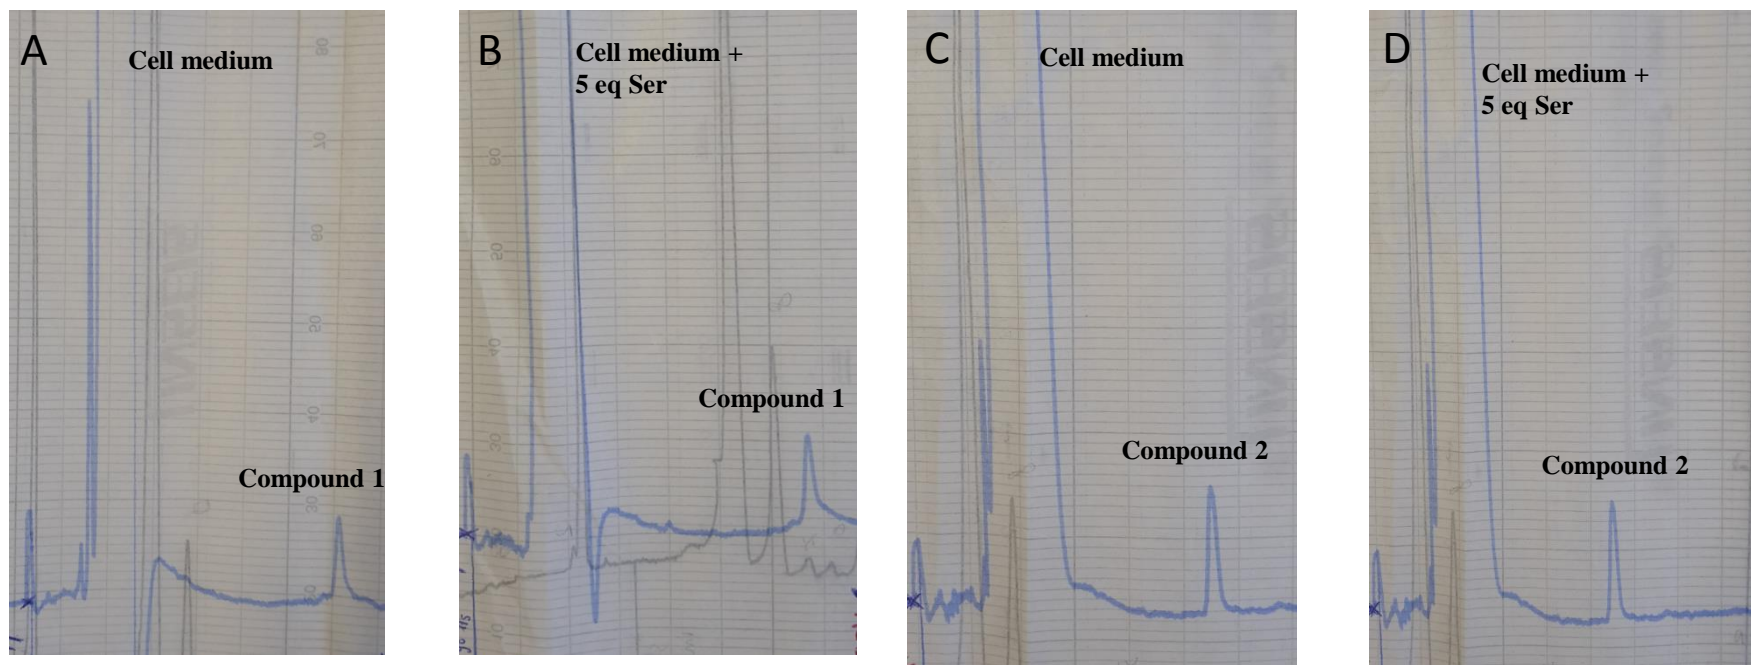

**Fig. S3.** A) HPLC trace of compound **1** in cell medium (D-MEM with 10% FBS); B) HPLC trace of compound **1** in cell medium/5 eq. Ser; C) HPLC trace of compound **2** in cell medium; D) HPLC trace of compound **2** in cell medium/5 eq. Ser. HPLC was performed on Phenomenex Luna C18 (5  $\mu$ m; 4.6 mm i.d. x 250 mm) with MeOH/H<sub>2</sub>O (85:15) as eluent (flow rate 1 mL/min).

$^1\text{H}$  NMR (700 MHz,  $\text{CDCl}_3$ ) of compound **1**

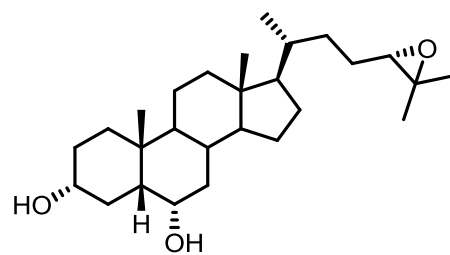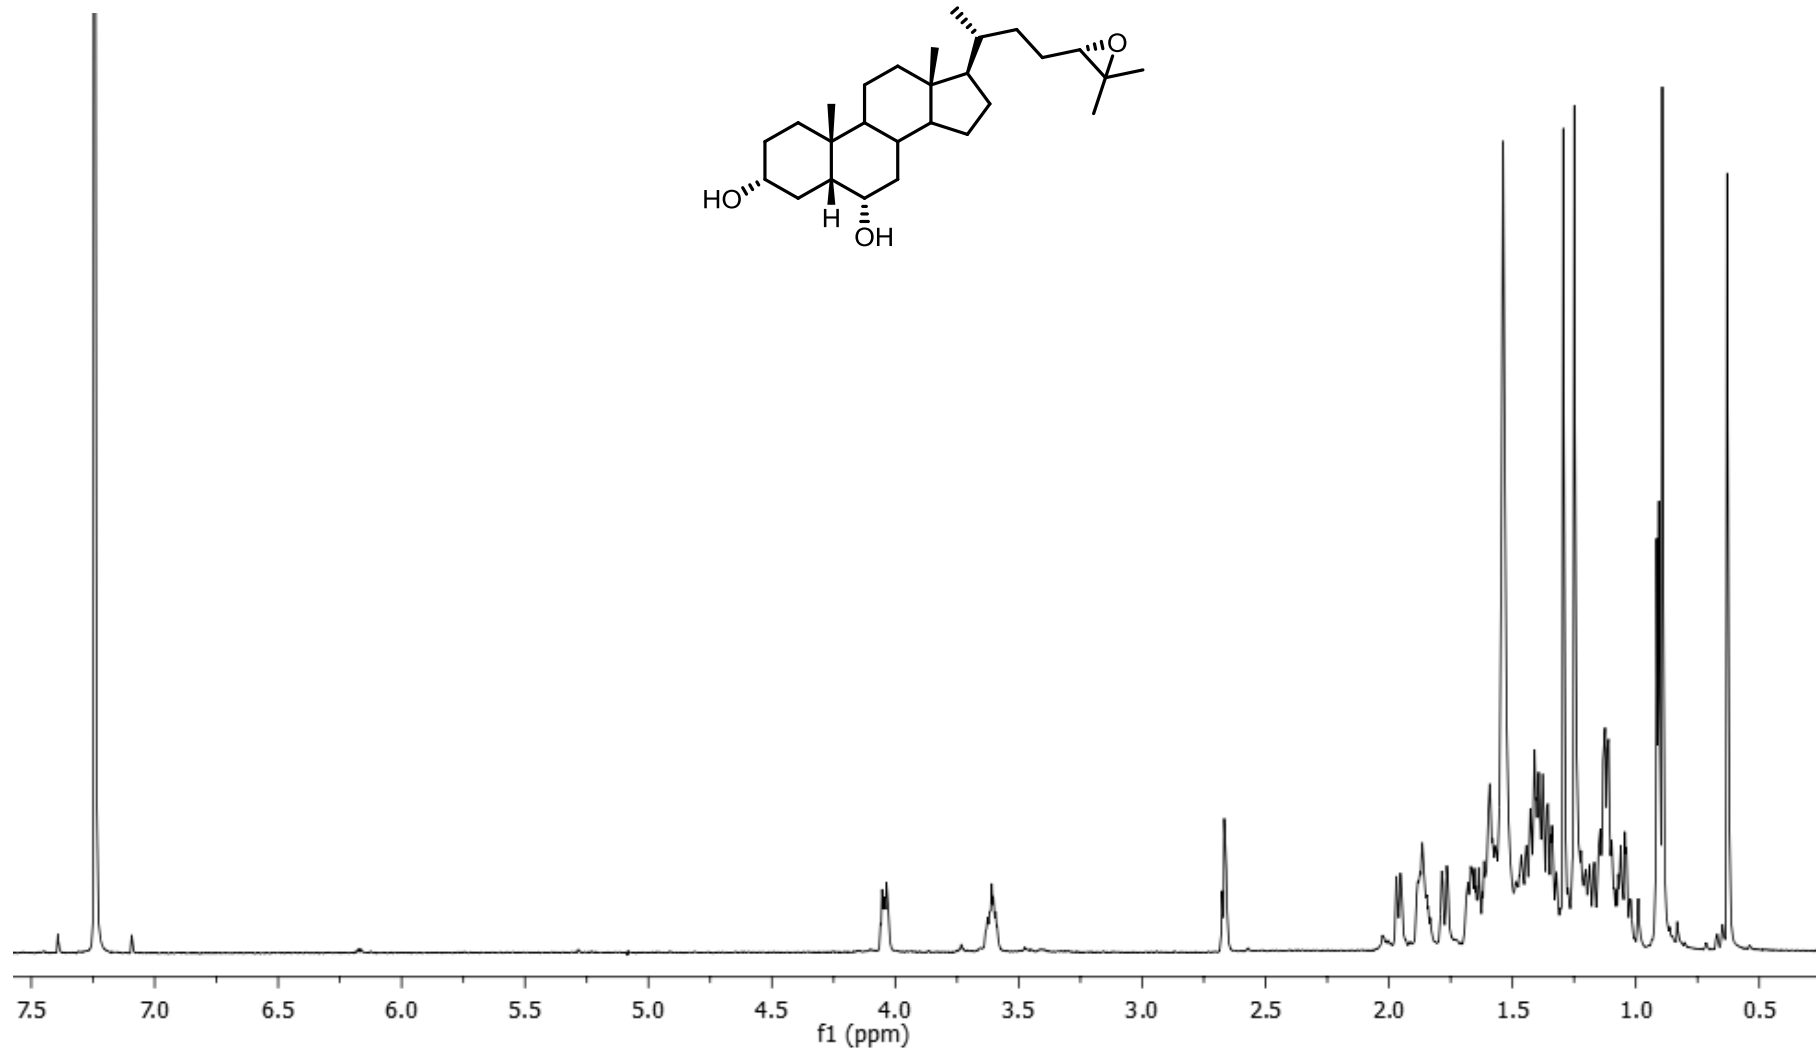

$^1\text{H}$  NMR (700 MHz,  $\text{CDCl}_3$ ) of compound **2**

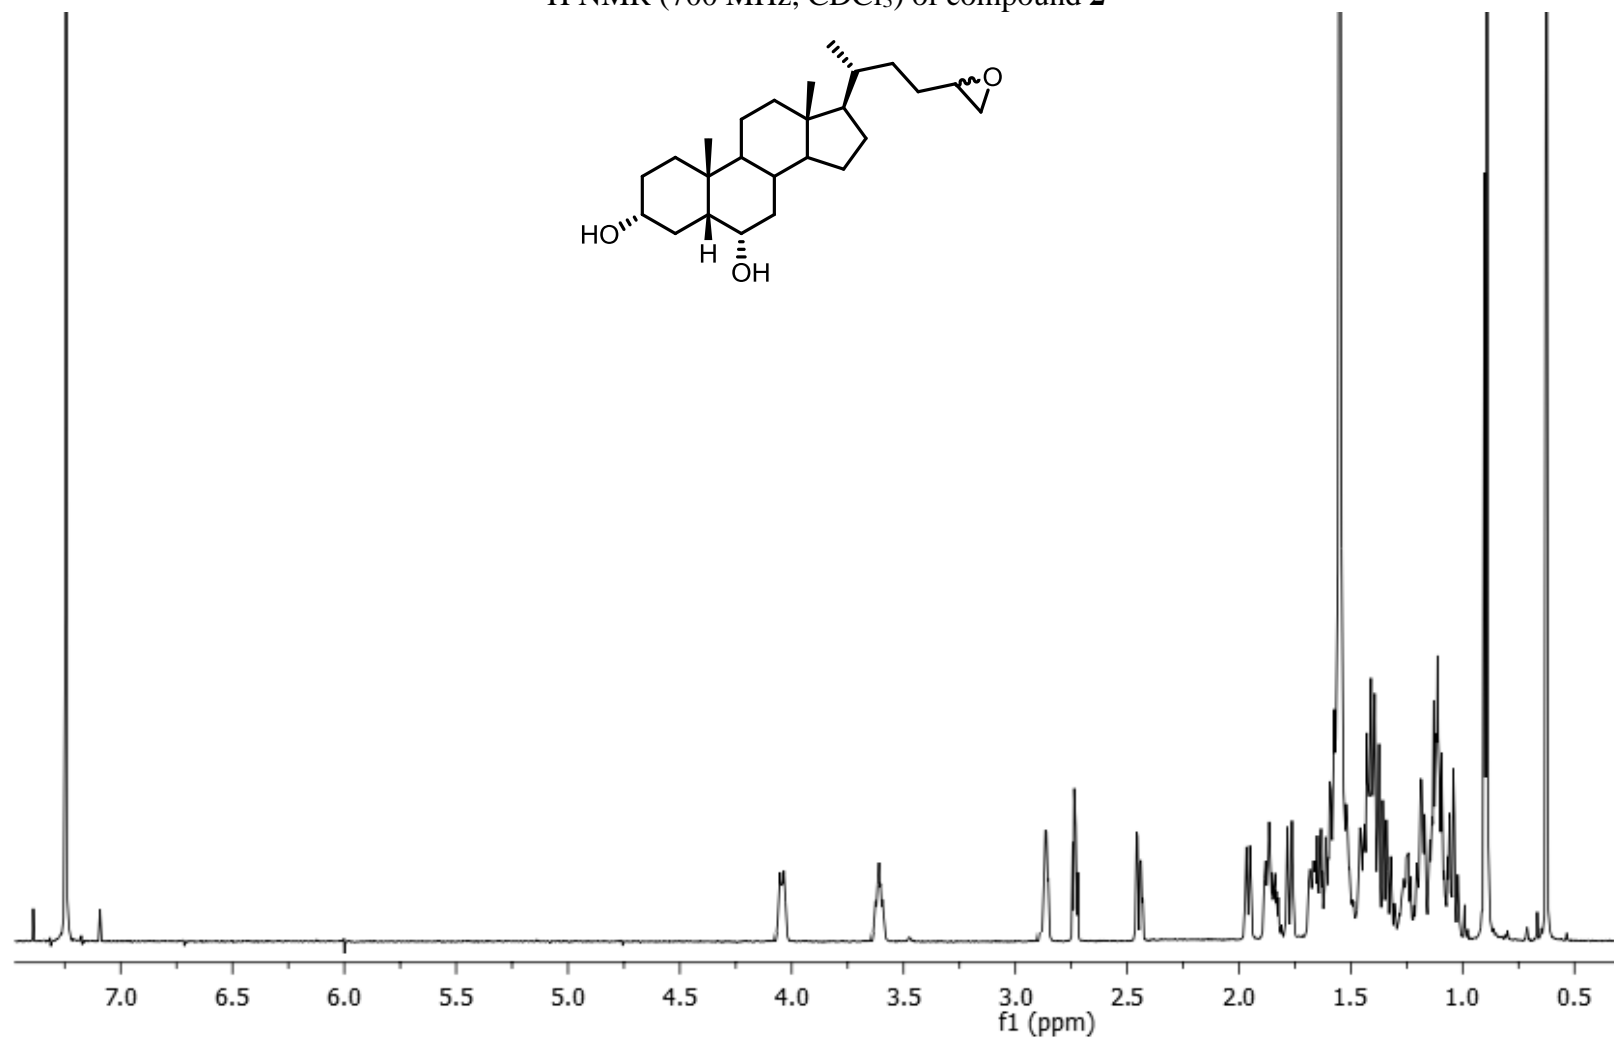



$^1\text{H}$  NMR (400 MHz,  $\text{CDCl}_3$ ) of compound **3**

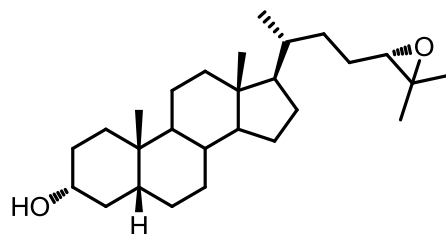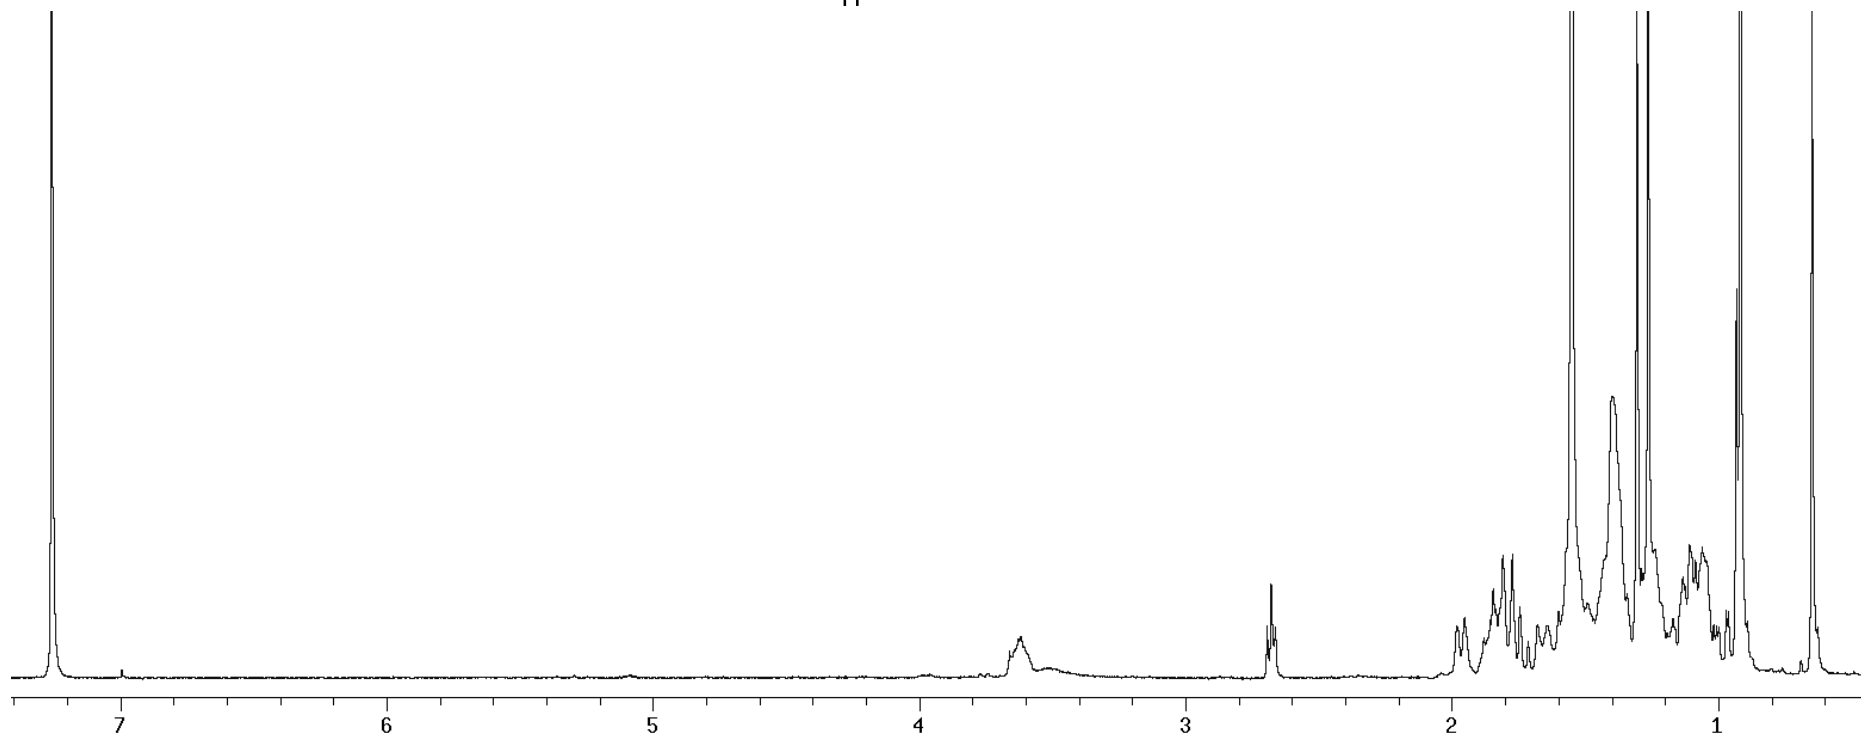

$^1\text{H}$  NMR (400 MHz,  $\text{CDCl}_3$ ) of compound **4**

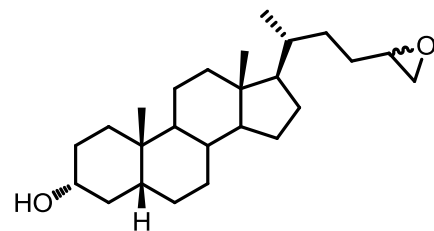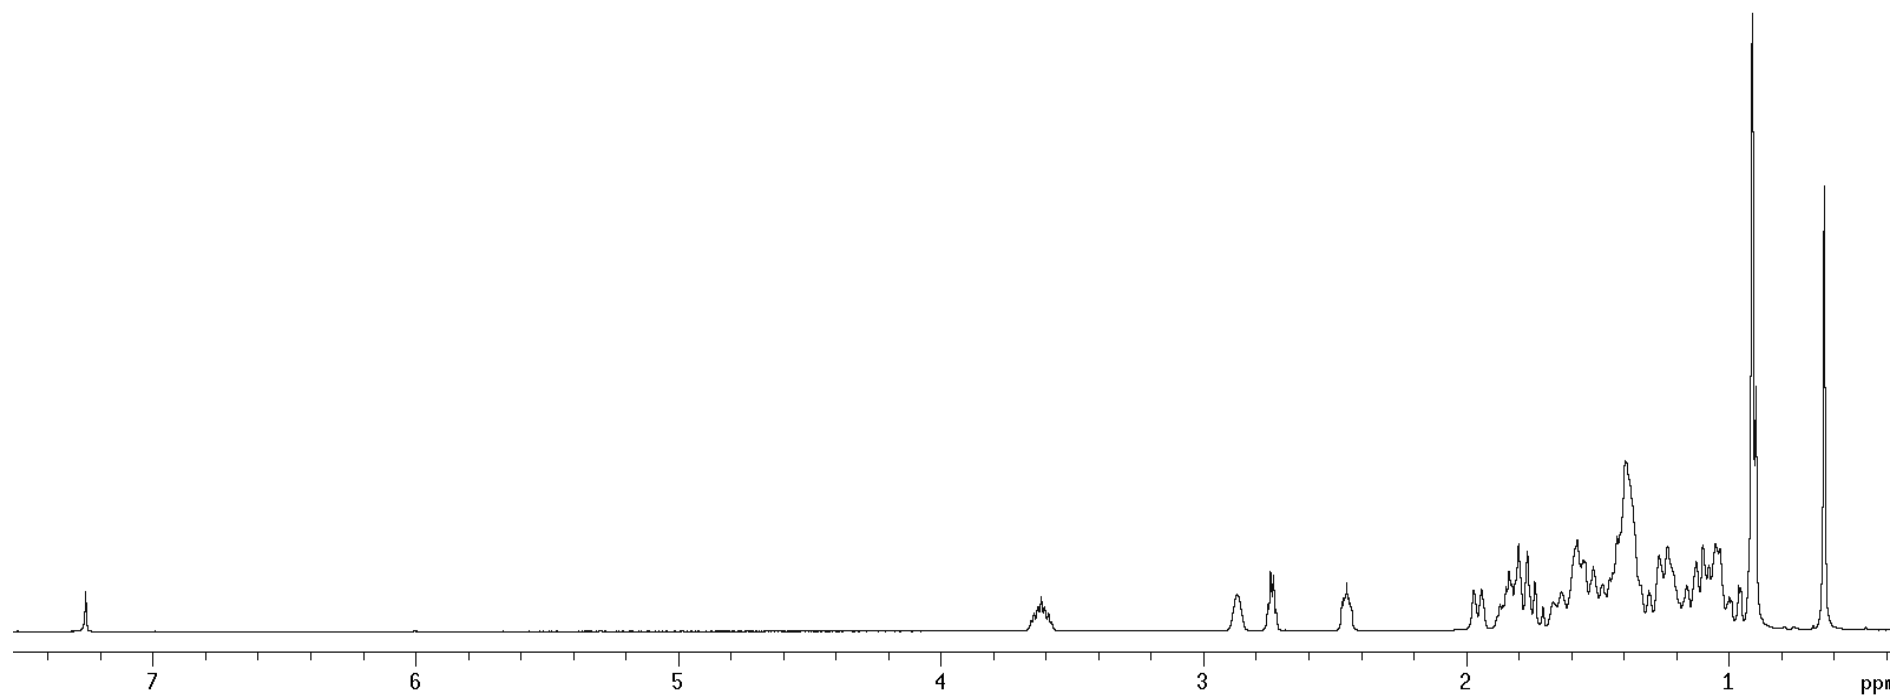

$^1\text{H}$  NMR (500 MHz,  $\text{CDCl}_3$ ) of compound **5**

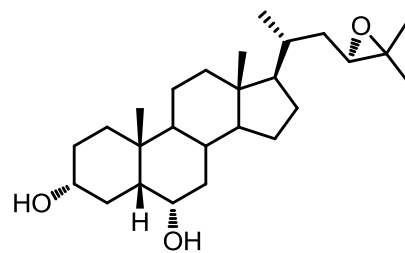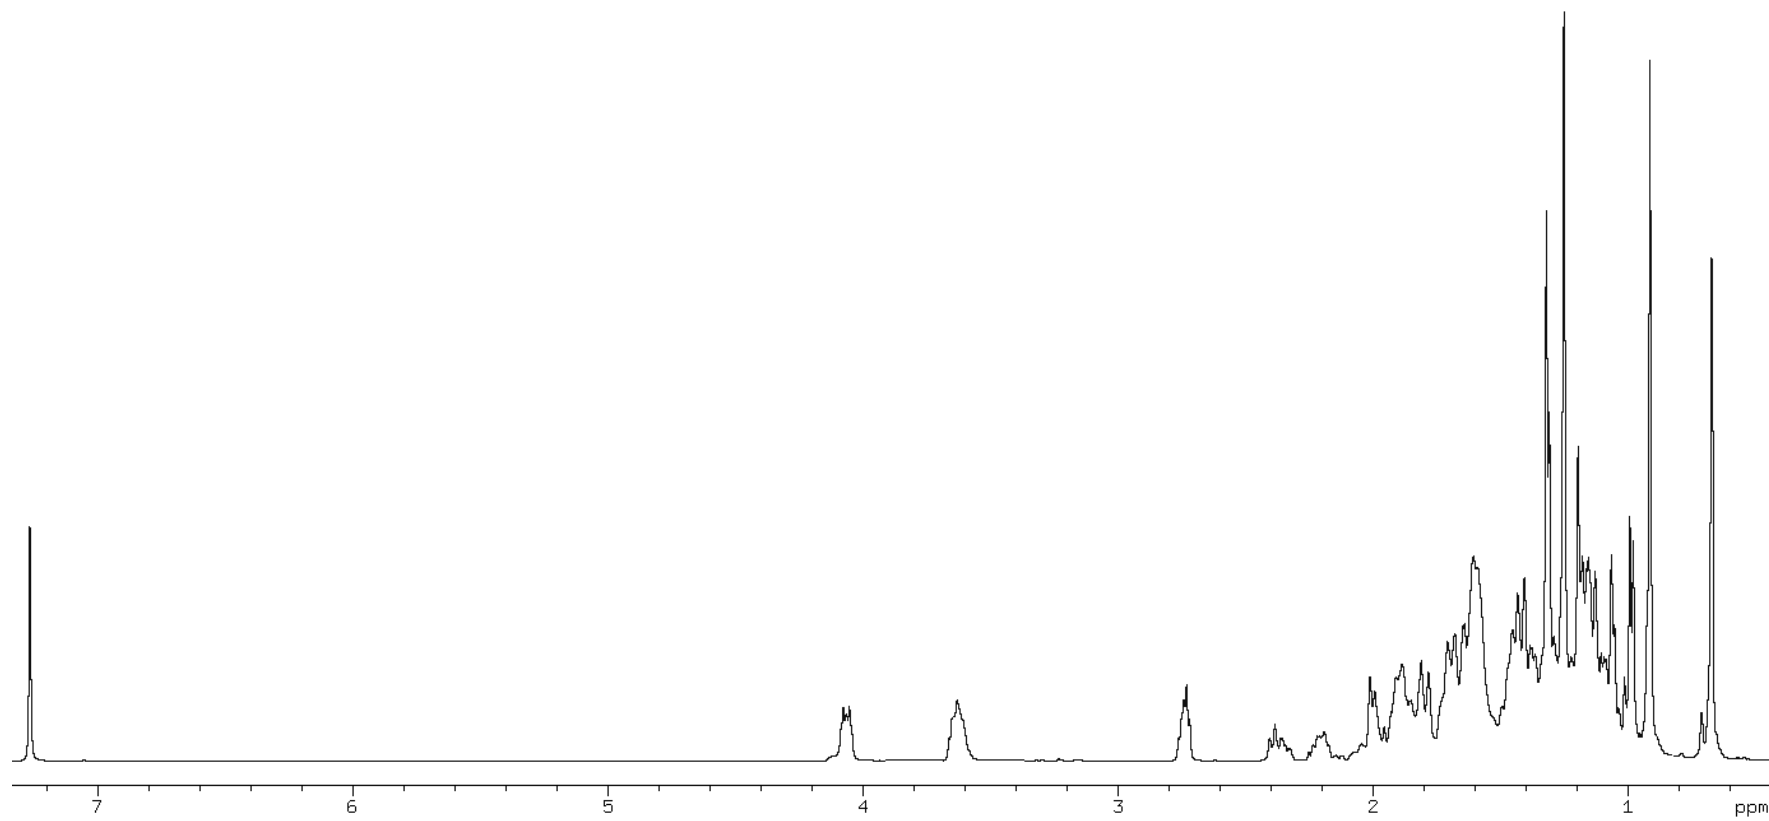

$^1\text{H}$  NMR (400 MHz,  $\text{CD}_3\text{OD}$ ) of compound **6**

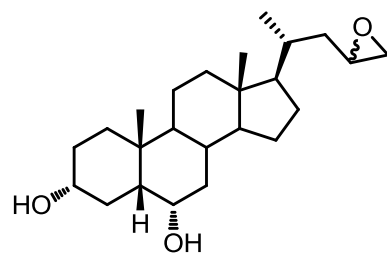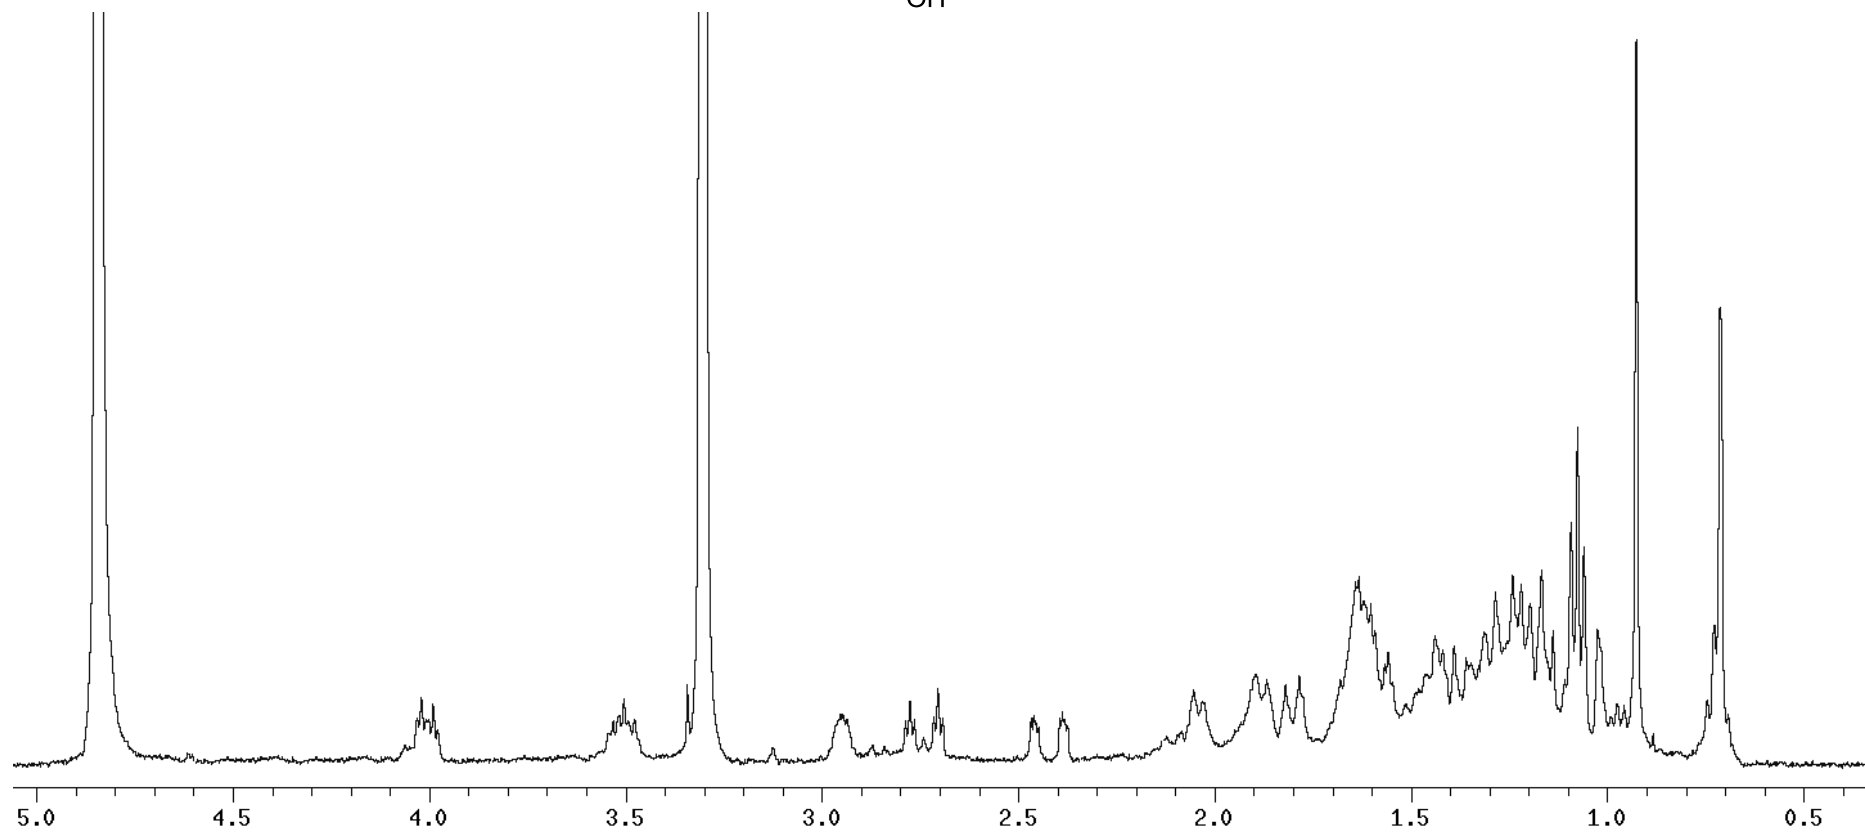

Supplement: c7ra04922f1.pdf [file c7ra04922f1.pdf]
